# Supplementary material for: Machine Learning Prediction of Cancer Cell Sensitivity to Drugs Based on Genomic and Chemical Properties
Source: PLoS One. 2013 Apr 30;8(4):e61318. doi: 10.1371/journal.pone.0061318 (PMC3640019; doi:10.1371/journal.pone.0061318)
Supplement: Text S1 — Performance measurements. (DOC) [file pone.0061318.s005.doc]

**Text S1: Measuring performance.**

The output of our method is the logarithm to base 10 of the IC50 in μM:

: Prediction of log(IC50) by our method

: Required concentration [μM] to eliminate 50% of the cancer cell population, computed as described in Garnett et al *Nature* 2012

We evaluated three different performance metrics, (i) one that captures the linear dependency of the prediction versus observation, (ii) a metric for outlining the variance of an assumed perfect prediction and (iii) additionally another metric that describes the average error of the model predictions:

(i) Pearson correlation coefficient (*Rp*) describes the relationship of prediction and observation. *Rp* is in a range from -1 to 1; negative correlations hint at inverse predictions (more predicted wrong than correct), *Rp* of 0 correspond to a random relationship (no correlation), and positive correlations indicate linear behaviour with positive gradient:

: Size of the test set

: Vector of observed/expected log(IC50) value

: Vector of predicted log(IC50) value

(ii) Coefficient of determination (*R2*) measures the proportion of the variance of the data that is explained by the regression model. As regression model, we assume a linear function representing a perfect prediction, or put a differently, plotting a line through observation-by-observation points. The following definition of *R2* typically returns values in range from 0 to 1, where values closer to one indicate a good prediction and 0 suggest weak fitting of the observations. However, since the regression model is not data driven and rather a conservative assumption of being a perfect prediction, also negative values are possible in case the prediction is far off the observation.

: Size of the test set

: Observed/expected log(IC50) value

: Average of all observed log(IC50) values

: Predicted log(IC50) value

(ii) Root mean square error (*RMSE)* provides an average of the error across all predictions made by the models:

: Size of the test set

: Observed/expected log(IC50) value

: Predicted log(IC50) value
